# Supplementary material for: Interleukin-30/IL27p28 Shapes Prostate Cancer Stem-like Cell Behavior and Is Critical for Tumor Onset and Metastasization
Source: Oxford University Press journal article supplement (doi:10.1158/0008-5472.can-17-3117), 2018-02-27
Supplement: 00085472can173117-sup-190645_3_supp_4579761_p4g7mh.pdf [file 00085472can173117-sup-190645_3_supp_4579761_p4g7mh.pdf]

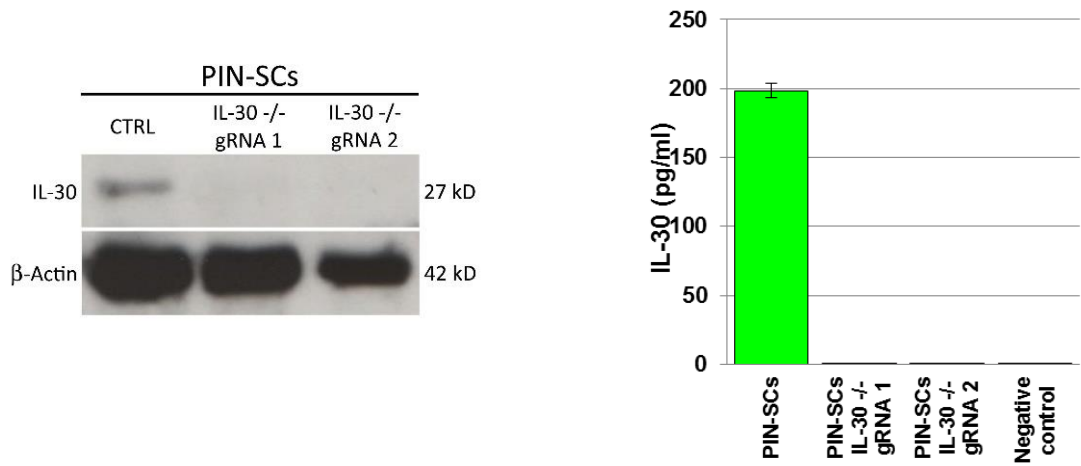

**Supplementary Figure S3.** WB analyses of IL-30 protein expression and ELISA assay after IL-30 gene deletion with two gRNA sequences in wild type PIN-SCs.
